# Supplementary material for: Parasitic Manipulation of Host Behaviour: Baculovirus SeMNPV EGT Facilitates Tree-Top Disease in Spodoptera exigua Larvae by Extending the Time to Death
Source: Insects. 2015 Jul 31;6(3):716–31. doi: 10.3390/insects6030716 (PMC4598661; doi:10.3390/insects6030716)
Supplement: Supplementary File 1 [file insects-06-00716-s001.pdf]

## Supplementary Materials

**Table S1.** Primers used in this study.

| Number | Primer Name                | Sequence (5'-3')                                                                        | Function                                                                                                                                                          |
|--------|----------------------------|-----------------------------------------------------------------------------------------|-------------------------------------------------------------------------------------------------------------------------------------------------------------------|
| 1      | $\Delta egt$ -ORF-Fw       | <i>CATCGGTCACCATGAACGGTTGCGCTGTCCTAATTTATTTTTGCACT</i><br><i>GGCTCGGATCCACTAGTAACGG</i> | Primer with 50 bp overhang (italics) to amplify a product for homologous recombination to remove part of the <i>egt</i> ORF                                       |
| 2      | $\Delta egt$ -ORF-Rv       | <i>ATTTAGGGTTAAATTACATGGTTCATACATACACACATCCTGTTTTT</i><br><i>CCTCTAGATGCATGCTCGAG</i>   | Primer with 50 bp overhang (italics) to amplify a product for homologous recombination to remove part of the <i>egt</i> ORF                                       |
| 3      | $\Delta egt$ -ATG-Fw       | <i>TTTAGGTCACCCATTACTGTATCGAATCATCGGTCACCGCTCGGATC</i><br><i>CACTAGTAACG</i>            | Primer with 50 bp overhang (italics) to amplify a product for homologous recombination to remove the <i>egt</i> start codon                                       |
| 4      | $\Delta egt$ -ATG-Rv       | <i>GCCGAACCCGTGGTCAGTGCAAAAAATAAAATTAGGACAGCGCAACC</i><br><i>GTTCTCTAGATGCATGCTCG</i>   | Primer with 50 bp overhang (italics) to amplify a product for homologous recombination to remove the <i>egt</i> start codon                                       |
| 5      | $\Delta egt$ -ORF-check Fw | ATGTGTGCTCTTCGTCAGATG                                                                   | To check the $\Delta egt$ -ORF deletion mutant                                                                                                                    |
| 6      | $\Delta egt$ -ORF-check Rv | TATTGCCTACGCGCGC                                                                        | To check the $\Delta egt$ -ORF deletion mutant                                                                                                                    |
| 7      | $\Delta egt$ -ATG-check Fw | GGCTAAACCGATGTTGTAGTG                                                                   | To check the $\Delta egt$ -ATG deletion mutant                                                                                                                    |
| 8      | $\Delta egt$ -ATG-check Rv | CCCGGTACCTCACACTAAATTAATTCTCAGTAATTGAC                                                  | To check the $\Delta egt$ -ATG deletion mutant                                                                                                                    |
| 9      | <i>egt</i> -repair-Fw      | ATTTACTGTATCGAATCATCGG                                                                  | To amplify a product for homologous recombination to generate the <i>egt</i> -repair virus, for RT-PCR on SeMNPV <i>egt</i> and to check <i>egt</i> -ATG deletion |
| 10     | <i>egt</i> -repair-Rv      | GGGTAAATTACATGGTTCATACA                                                                 | To amplify a product for homologous recombination to generate the <i>egt</i> -repair virus                                                                        |
| 11     | Se- <i>eIF5A</i> -Fw       | GCCATGGCTGACATCGAGGATAC                                                                 | RT-PCR on <i>S. exigua eIF5A</i>                                                                                                                                  |
| 12     | Se- <i>eIF5A</i> -Rv       | GCGGTACCGGTTTATTTGTCGAGAGC                                                              | RT-PCR on <i>S. exigua eIF5A</i>                                                                                                                                  |
| 13     | Se- <i>ie1</i> Fw          | GACAAGAATGACGATGATATCGG                                                                 | RT-PCR on SeMNPV <i>ie1</i>                                                                                                                                       |
| 14     | Se- <i>ie1</i> Rv          | GGACAATTGCTTTTCCGAAAAC                                                                  | RT-PCR on SeMNPV <i>ie1</i>                                                                                                                                       |
| 15     | Se- <i>egt</i> -ORF-Fw     | CAAGAGGTTGATTGACGAACAA                                                                  | RT-PCR on SeMNPV <i>egt</i> and to check <i>egt</i> -ORF deletion                                                                                                 |
| 16     | Se- <i>egt</i> -ORF-Rv     | AGCGATTTGGGATGTTTGTC                                                                    | RT-PCR on SeMNPV <i>egt</i> and to check <i>egt</i> -ORF and <i>egt</i> -ATG deletion                                                                             |

**Table S2.** (A) Outcome of the logistic regression analysis of the infectivity assays. Per replicate, an odds ratio (relative potency) was determined for each virus: the ratio of the infectivity of the respective virus relative to the infectivity of the G25 WT virus. The upper and lower limits of the 95% confidence interval are also given, as well as the *P* value.

| Replicate | Viruses            | Odds Ratio | 95% Confidence Interval |        | <i>P</i> value |
|-----------|--------------------|------------|-------------------------|--------|----------------|
|           |                    |            | Low                     | High   |                |
| 1         | G25 WT             | 1.000      | -                       | -      | -              |
|           | SeBac10 WT         | 1.634      | 0.988                   | 2.715  | 0.057          |
|           | $\Delta egt$ -ORF  | 2.654      | 1.601                   | 4.440  | <0.001 ***     |
|           | $\Delta egt$ -ATG  | 5.989      | 3.542                   | 10.292 | <0.001 ***     |
|           | <i>egt</i> -repair | 3.845      | 2.300                   | 6.509  | <0.001 ***     |
| 2         | G25 WT             | 1.000      | -                       | -      | -              |
|           | SeBac10 WT         | 1.291      | 0.774                   | 2.158  | 0.329          |
|           | $\Delta egt$ -ORF  | 0.680      | 0.407                   | 1.132  | 0.139          |
|           | $\Delta egt$ -ATG  | 1.135      | 0.679                   | 1.902  | 0.629          |
|           | <i>egt</i> -repair | 1.759      | 1.046                   | 2.974  | 0.034 *        |
| 3         | G25 WT             | 1.000      | -                       | -      | -              |
|           | SeBac10 WT         | 1.330      | 0.786                   | 2.256  | 0.288          |
|           | $\Delta egt$ -ORF  | 0.597      | 0.349                   | 1.016  | 0.058          |
|           | $\Delta egt$ -ATG  | 1.607      | 0.946                   | 2.745  | 0.080          |
|           | <i>egt</i> -repair | 0.899      | 0.531                   | 1.521  | 0.691          |

**Table S2.** (B) Dose-mortality response (log LC<sub>50</sub>) and mean time to death (MTD) of 3rd instar *S. exigua* larvae infected with G25 WT, SeBac10 WT,  $\Delta egt$ -ORF,  $\Delta egt$ -ATG or *egt*-repair virus. MTD was determined for a virus concentration of 10<sup>6</sup> OBs/mL (approximately 90%–95% mortality).

| Virus              | Log LC <sub>50</sub><br>(OBs/mL) | Log 95% Confidence<br>Interval (OBs/mL) |      | MTD<br>(h) | 95% Confidence<br>Interval (h) |       |
|--------------------|----------------------------------|-----------------------------------------|------|------------|--------------------------------|-------|
|                    |                                  | low                                     | high |            | low                            | high  |
| G25 WT             | 4.70                             | 4.44                                    | 4.97 | 73.84      | 71.87                          | 75.81 |
| SeBac10 WT         | 4.42                             | 4.16                                    | 4.67 | 73.51      | 71.75                          | 75.28 |
| $\Delta egt$ -ORF  | 4.64                             | 4.40                                    | 4.88 | 64.56      | 62.43                          | 66.68 |
| $\Delta egt$ -ATG  | 4.08                             | 3.84                                    | 4.30 | 68.95      | 66.74                          | 71.16 |
| <i>egt</i> -repair | 4.26                             | 3.98                                    | 4.53 | 76.48      | 74.66                          | 78.29 |

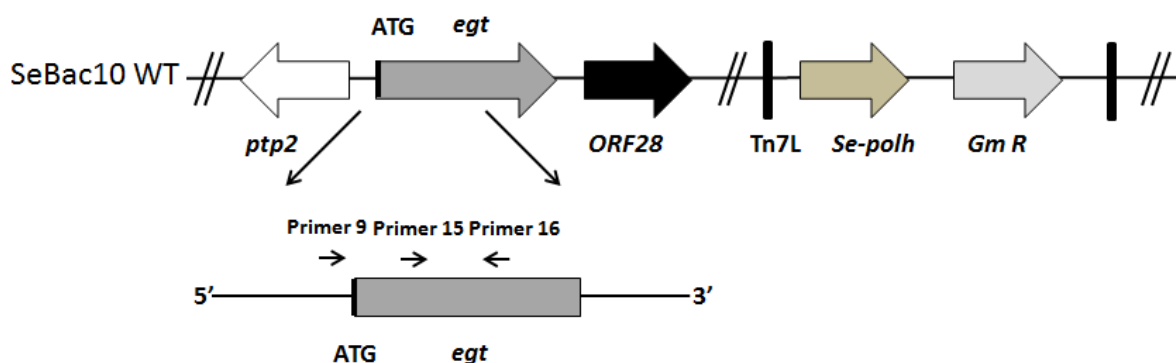

**Figure S1.** Position of the primers (horizontal arrows) that were used to check the deletion of the *egt* ORF or *ATG* start codon. Primers 15 and 16 anneal within the *egt* ORF and were used to check the deletion of the *egt* ORF. Primer 9 (anneals 27 bp upstream of the *egt* start codon) and primer 16 (anneals within the *egt* ORF) were used to check the deletion of the *egt* start codon.

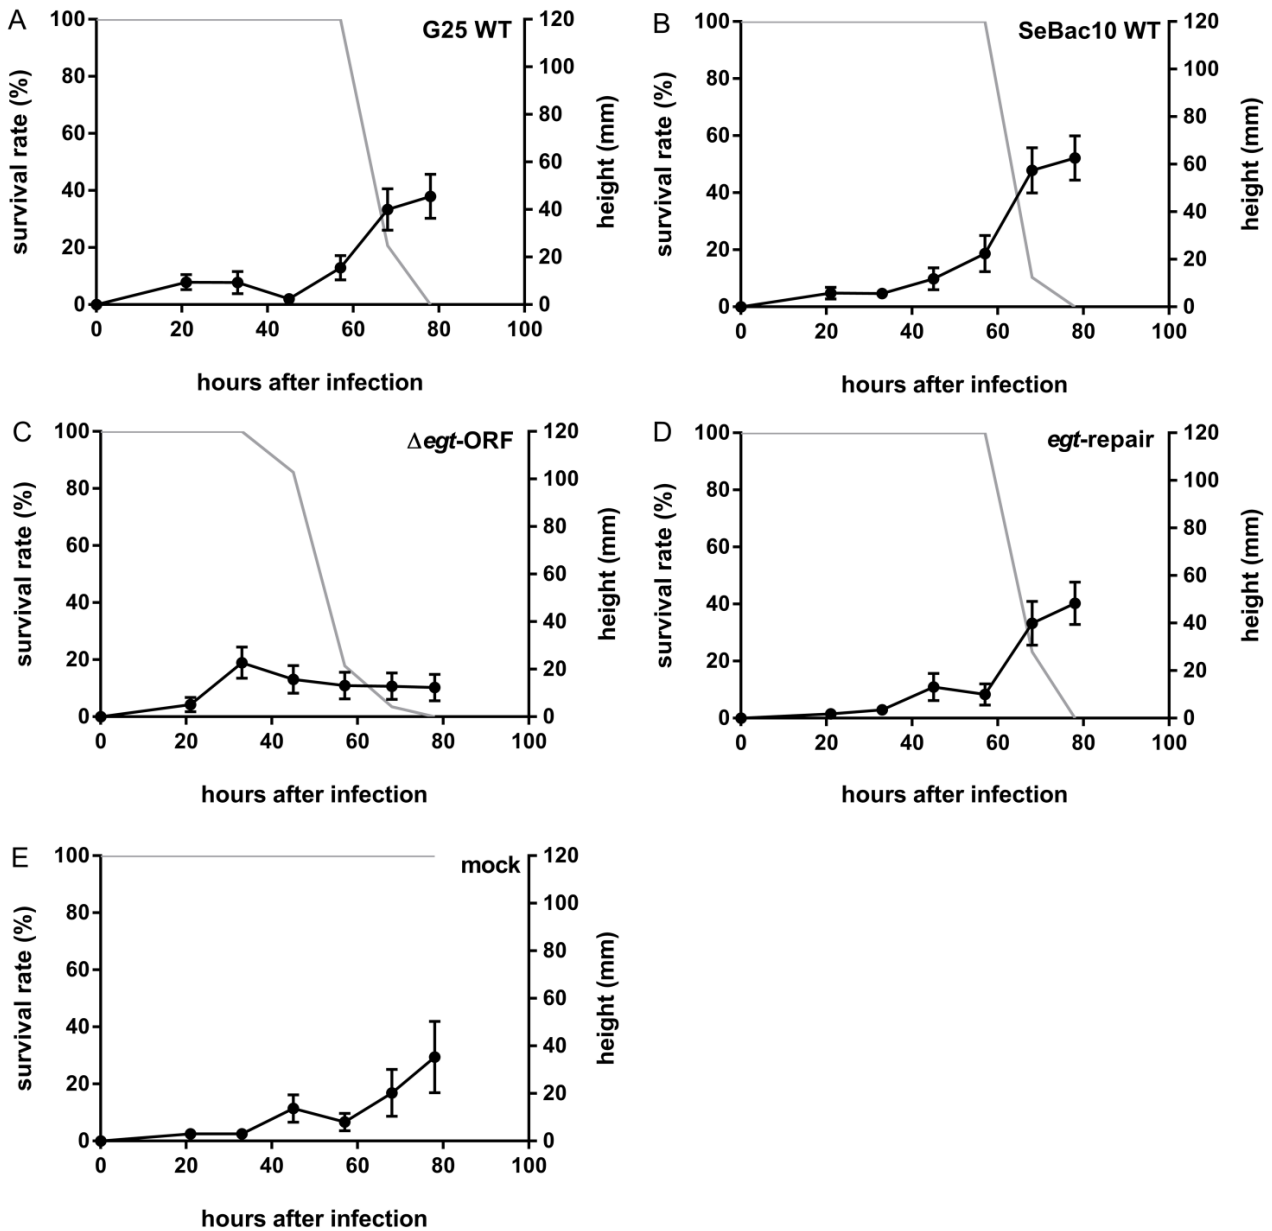

**Figure S2.** Repetition of the experiment presented in Figure 2. The effect of the deletion of the *egt* ORF on SeMNPV-induced tree-top disease in *S. exigua* larvae. Percentage surviving larvae (grey line) and height (mm) of larvae or cadavers (black line) were recorded at different time points after infection for 3rd instar *S. exigua* larvae infected with G25 WT (A,  $n = 29$ ), SeBac10 WT (B,  $n = 29$ ),  $\Delta egt$ -ORF (C,  $n = 28$ ), *egt*-repair (D,  $n = 30$ ) or mock (E,  $n = 10$ ). Error bars represent the standard error of the mean (SEM).

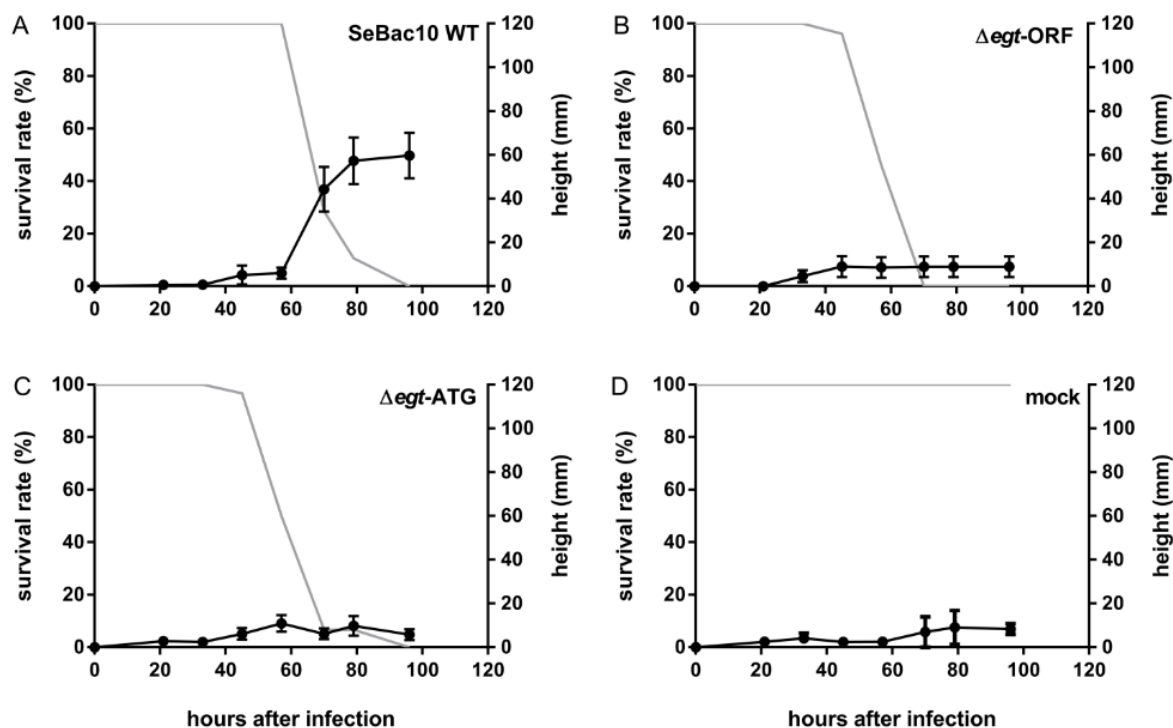

**Figure S3.** Repetition of the experiment presented in Figure 3. The effect of the deletion of the *egt* start codon on SeMNPV-induced tree-top disease in *S. exigua* larvae. Percentage surviving larvae (grey line) and height (mm) of larvae or cadavers (black line) were recorded at different time points after infection for 3rd instar *S. exigua* larvae infected with SeBac10 WT (**A**,  $n = 28$ ),  $\Delta egt$ -ORF (**B**,  $n = 26$ ),  $\Delta egt$ -ATG (**C**,  $n = 30$ ) or mock (**D**,  $n = 10$ ). Error bars represent the standard error of the mean (SEM).

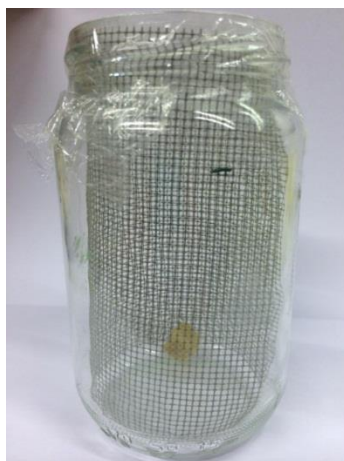

**Figure S4.** Experimental set-up for measuring pre-death climbing behaviour. Larvae were placed individually in glass jars (120 mm high and 71 mm in diameter). Sterile mesh wire was placed in the jars to facilitate climbing and a piece of artificial food was placed at the bottom of the jar [11].
